# Supplementary material for: Ultrasensitive detection of mercury(ii) in aqueous solutions via the spontaneous precipitation of CsPbBr3 crystallites
Source: Royal Society of Chemistry journal article supplement (doi:10.1039/d2dt02333d), 2022-01-01
Supplement: d2dt02333d1.pdf [file d2dt02333d1.pdf]

## Ultrasensitive detection of mercury (II) in aqueous solution via spontaneous precipitation of CsPbBr<sub>3</sub> crystallites

Wenjing Jiang,<sup>a,b</sup> Yi Xu,<sup>a,b</sup> Li Wang,<sup>\*a,b</sup> Li Chen,<sup>a,b</sup> and Shunbo Li,<sup>\*a,b</sup>

a. Key Laboratory of Optoelectronic Technology and Systems, Ministry of Education & Key Disciplines Laboratory of Novel Micro-Nano Devices and System Technology, College of Optoelectronic Engineering, Chongqing University, Chongqing 400044, China. Email: shunbo.li@cqu.edu.cn (S. Li) and wangliyu@cqu.edu.cn (L. Wang)

b. International R & D center of Micro-nano Systems and New Materials Technology, Chongqing University, Chongqing 400044, China.

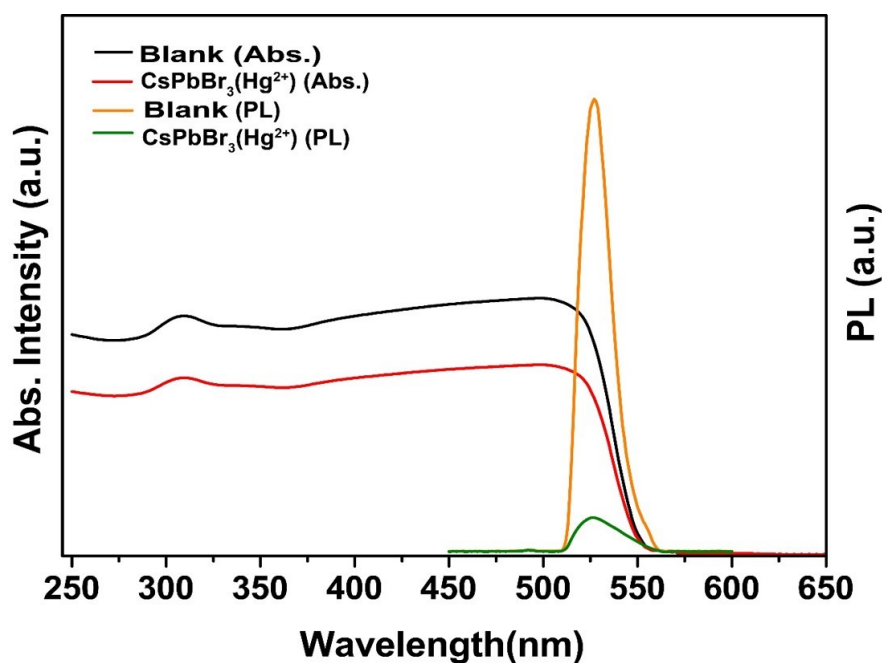

**Fig. S1** The UV-vis spectra of the prepared CsPbBr<sub>3</sub> crystals with and without presence of mercury ion on the left, and the photoluminescence of CsPbBr<sub>3</sub> crystals with and without presence of mercury ion on the right.

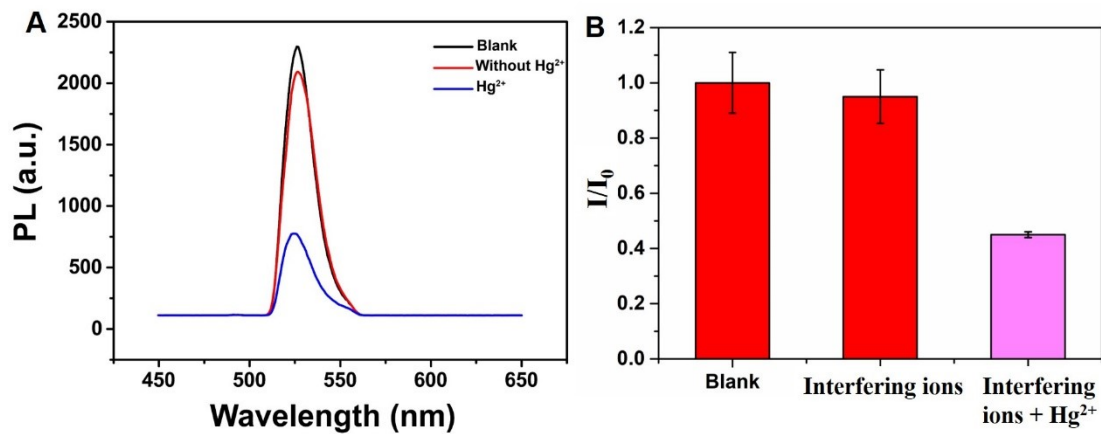

**Fig. S2** (A) The photoluminescent spectra of CsPbBr<sub>3</sub> precipitated from DI water (black curve), solution with interfering ions (red curve) and mixed solution with interfering ions and 0.1 μM Hg<sup>2+</sup> (blue curve); (B) The fluorescent intensity changes ( $I/I_0$ ) of CsPbBr<sub>3</sub> precipitated from DI water (blank), solution with interfering ions and mixed solution with interfering ions and 0.1 μM Hg<sup>2+</sup>. The interfering ions include Ni<sup>2+</sup>, Mg<sup>2+</sup>, Ca<sup>2+</sup>, Co<sup>2+</sup>, Cu<sup>2+</sup>, Pb<sup>2+</sup>, Cd<sup>2+</sup>, Mn<sup>2+</sup>, Fe<sup>2+</sup>, Al<sup>3+</sup> and K<sup>+</sup> with concentration of 1 μM for each.  $I_0$  is the peak intensity for blank sample. The emission spectra were measured four times for each condition.
